# Supplementary material for: QUALIPAED—A retrospective quality control study evaluating pediatric long axial field-of-view low-dose FDG-PET/CT
Source: PubMed Central journal article supplement (PMC11440848; doi:10.3389/fnume.2024.1398773), 2024-06-13
Supplement: Datasheet1.pdf [file Datasheet1.pdf]

## Supplementary Material

### 1 Supplementary Data

#### 1.1 Age & referral

- 16y Recurrence, Post-Transplant Lymphoproliferative Disorder (PTLD)  
17y Treatment control, bilateral germ cell tumors in the ovaries + multiple vascular thrombi  
5y Treatment control, adrenocortical carcinoma with liver recurrence  
10y Recurrence, hepatoblastoma + residual disease in scapula  
13y Primary diagnosis, vertebral tumor with neuroforaminal involvement  
15y Recurrence, anaplastic large cell lymphoma  
15y Treatment control, mediastinal germ cell tumor + thrombosis of subclavian vein  
10y Primary diagnosis, occult tumor in the lung  
14y Primary diagnosis, occult malignancy  
15y Treatment control, nasopharyngeal cancer  
15y Treatment control, disseminated and refractory osteogenic sarcoma  
10y Primary diagnosis, osteomyelitis in the jaw + tuberculosis  
2y Primary diagnosis, occult cancer in the small pelvis  
10y Treatment control, lymphoma  
13y Primary diagnosis, occult tumor in thoracic vertebra (Th1) seen on MR  
16y Treatment control, melanocytic tumor  
10y Recurrence, hepatoblastoma  
13y Recurrence, sarcoidosis  
10y Treatment control, Burkitt's lymphoma  
10y Primary diagnosis, Hodgkin's lymphoma + nodular sclerosis  
11y Treatment control, sarcoma  
17y Recurrence /treatment control, medulloblastoma  
8y Primary diagnosis, chronic lymphadenitis + intermittent fever  
16y Treatment control, alveolar rhabdomyosarcoma  
8y Primary diagnosis, abscess/endocarditis/salmonella  
14y Treatment control, Hodgkin's lymphoma  
7y Recurrence, infection with salmonella  
16y Primary diagnosis, lung abscess  
17y Primary diagnosis, residual fever  
16y Treatment control, Hodgkin's lymphoma  
14y Recurrence, lymphadenopathy + Griscelli syndrome + hemophagocytosis  
16y Primary diagnosis, infection of spinal implant  
17y Staging, lymphoma  
15y Treatment control, lymphoma  
15y Treatment control, osteogenic sarcoma  
2y Treatment control, alveolar rhabdomyosarcoma  
14y Primary diagnosis, PTLD + Epstein-Barr virus  
2y Treatment control, disseminated alveolar rhabdomyosarcoma  
16y Primary diagnosis, sarcoma  
5y Treatment control, adrenocortical carcinoma with liver recurrence  
6y Treatment control, Langerhans cell histiocytosis  
16y Recurrence, alveolar rhabdomyosarcoma left arm  
16y Treatment control, Hodgkin's lymphoma  
0.25y Primary diagnosis, sarcoma  
17y Treatment control, Hodgkin's lymphoma  
10y Treatment control, hepatoblastoma  
4y Primary diagnosis, osteomyelitis

- 13y *Primary diagnosis, endocarditis with extra-cardial foci*
- 16y *Staging, multifocal infiltrations suspect of malignancy on MR*
- 10y *Treatment control, Hodgkin's lymphoma*

## 1.2 Total list of anatomical sites

### Organs

- 1 *Brain*
- 2 *Oro/naso/hypopharynx/larynx*
- 3 *Thyroid gland*
- 4 *Lung, right*
- 5 *Lung, left*
- 6 *Pleura, right*
- 7 *Pleura, left*
- 8 *Breast, right*
- 9 *Breast, left*
- 10 *Esophagus*
- 11 *Liver*
- 12 *Pancreas*
- 13 *Adrenal gland, right*
- 14 *Adrenal gland, left*
- 15 *Kidney, right*
- 16 *Kidney, left*
- 17 *Spleen*
- 18 *Stomach*
- 19 *Bowel*
- 20 *Peritoneal*
- 21 *Ovary, right*
- 22 *Ovary, left*
- 23 *Uterus*
- 24 *Cervix*
- 25 *Vagina/vulva*
- 26 *Prostate*
- 27 *Penis/scrotum*
- 28 *Bones*
- 29 *Cutis/skin*
- 30 *Other*

### Lymphnodes

- 31 *Head/neck, right*
- 32 *Head/neck, left*
- 33 *Axilla/subpect, right*
- 34 *Axilla/subpect, left*
- 35 *Mediastinum/hilar/retrocrural*
- 36 *Int mam, precardiac*
- 37 *Retroperitoneal*
- 38 *Abdominal*
- 39 *Iliac, right*
- 40 *Iliac, left*
- 41 *Groin, right*
- 42 *Groin, left*
- 43 *Lnn, other*

## 2 Supplementary Tables

### 2.1 Summary of statistical results from the evaluation of lesion detection.

SUPPL. TABLE 2.1 Summary of statistical results from the evaluation of lesion detection.

| Acquisition grouping                    | Friedman's test        | Corresponding pairs | Wilcoxon signed rank test |
|-----------------------------------------|------------------------|---------------------|---------------------------|
| <b>Total Findings</b>                   | <b>Significant</b>     |                     |                           |
| Time dependent acquisitions             | Significant            | F150s – F300s       | Significant               |
|                                         |                        | F150s – F600s       | Significant               |
|                                         |                        | F300 – F600s        | Not significant           |
| Filter/iteration dependent acquisitions | Not significant        | -                   | -                         |
| <b>Organ Findings</b>                   | <b>Not significant</b> |                     |                           |
| Time dependent acquisitions             | NA                     | -                   | -                         |
| Filter/iteration dependent acquisitions | NA                     | -                   | -                         |
| <b>Lymph node Findings</b>              | <b>Significant</b>     |                     |                           |
| Time dependent acquisitions             | Significant            | F150s – F300s       | Significant               |
|                                         |                        | F150s – F600s       | Significant               |
|                                         |                        | F150s – NF4i300s    | NS                        |
|                                         |                        | F150s – NF6i300s    | NS                        |
|                                         |                        | F300s – F600s       | Not significant           |
| Filter/iteration dependent acquisitions | Significant            | F300s – NF4i300s    | Not significant           |
|                                         |                        | F300s – NF6i300s    | Not significant           |
|                                         |                        | F600s – NF4i300s    | NS                        |
|                                         |                        | F600s – NF6i300s    | NS                        |
|                                         |                        | NF4i300s – NF6i300s | Not significant           |

Suppl. table 2.1: NA: Not applicable. NS: Not significant. These pairs were included as possible pairs in the Bonferroni correction, but have no relevant outcome and are therefore not included.

### 2.2 Significance of Friedman's test

SUPPL. TABLE 2.2 Significance of Friedman's test

| P-value of           | All five reconstructions | Time dependent<br>F150s, F300s, F600s | Filter/iteration dependent<br>F300s, NF4i300s, NF6i300s |
|----------------------|--------------------------|---------------------------------------|---------------------------------------------------------|
| Total image findings | <0.001*                  | <0.001*                               | 0.058                                                   |
| Organ findings       | 0.837                    | NA                                    | NA                                                      |
| Lymph node findings  | <0.001*                  | <0.001*                               | 0.045*                                                  |

Suppl. table 2.2: All P-values of the performed Friedman's test. Significance marked with \*. Friedman's test was performed for the time and filter/iteration dependent acquisitions when the initial for all five reconstructions was significant. Pairwise comparison was indicated when significant values were found in the time and filter/iteration dependent groupings. NA: Not applicable

### 2.3 Time dependent Wilcoxon rank test significance.

SUPPL. TABLE 2.3 Time dependent Wilcoxon rank test significance.

| Compared time dependent acquisitions |               |               |               |
|--------------------------------------|---------------|---------------|---------------|
|                                      | F150s → F300s | F300s → F600s | F150s → F600s |
| <b>Total lesions</b>                 |               |               |               |
| Increase in lesions                  | +150*         | +9            | +159*         |
| P                                    | <0.001        | 0.039         | <0.001        |
| P <sub>B</sub>                       | 0.007         | 0.512         | 0.006         |
| <b>Organ lesions</b>                 |               |               |               |
| Increase in lesions                  | +6            | 0             | +6            |
| P                                    | NA            | NA            | NA            |
| P <sub>B</sub>                       | -             | -             | -             |
| <b>Lymph node lesions</b>            |               |               |               |
| Increase in lesions                  | +144*         | +9            | +153*         |
| P                                    | 0.001         | 0.039         | 0.001         |
| P <sub>B</sub>                       | 0.019         | 0.512         | 0.019         |

*Suppl. Table 2.3: All P-values for the paired comparison of lesion detection between the time dependent acquisitions. Bonferroni correction by a factor of 13 P-value (P<sub>B</sub>). NA: Not applicable*

### 2.4 Filter/iteration dependent Wilcoxon rank test significance

SUPPL. TABLE 2.4 Filter/iteration dependent Wilcoxon rank test significance

| Compared filter/iteration dependent acquisitions |                  |                     |                  |
|--------------------------------------------------|------------------|---------------------|------------------|
|                                                  | F300s → NF4i300s | NF4i300s → NF6i300s | F300s → NF6i300s |
| <b>Total lesions</b>                             |                  |                     |                  |
| Increase in lesions                              | +20              | +14                 | +34              |
| P                                                | NA               | NA                  | NA               |
| P <sub>B</sub>                                   | -                | -                   | -                |
| <b>Organ lesions</b>                             |                  |                     |                  |
| Increase in lesions                              | -1               | 0                   | -1               |
| P                                                | NA               | NA                  | NA               |
| P <sub>B</sub>                                   | -                | -                   | -                |
| <b>Lymph node lesions</b>                        |                  |                     |                  |
| Increase in lesions                              | +21              | +14                 | +35              |
| P                                                | 0.181            | 0.017               | 0.062            |
| P <sub>B</sub>                                   | -                | 0.218               | -                |

*Suppl. Table 2.4: All P-values for the paired comparison of lesion detection between the filter and iteration dependent acquisitions. Bonferroni correction by a factor of 13 (P<sub>B</sub>). NA: Not applicable*
